# Supplementary material
Source: Hindawi journal article supplement (doi:10.1155/2011/543912)
Supplement: f1 [file 543912.f1.doc]

**Specific and non-homologous isofunctional enzymes of the Genetic Information Processing Pathways as potential therapeutical targets for the Tritryps**

Monete Rajão Gomes, Ana Carolina Ramos Guimarães and Antonio Basílio de Miranda

**Supplementary Material**

***RNA Polymerase (map03020)***

**
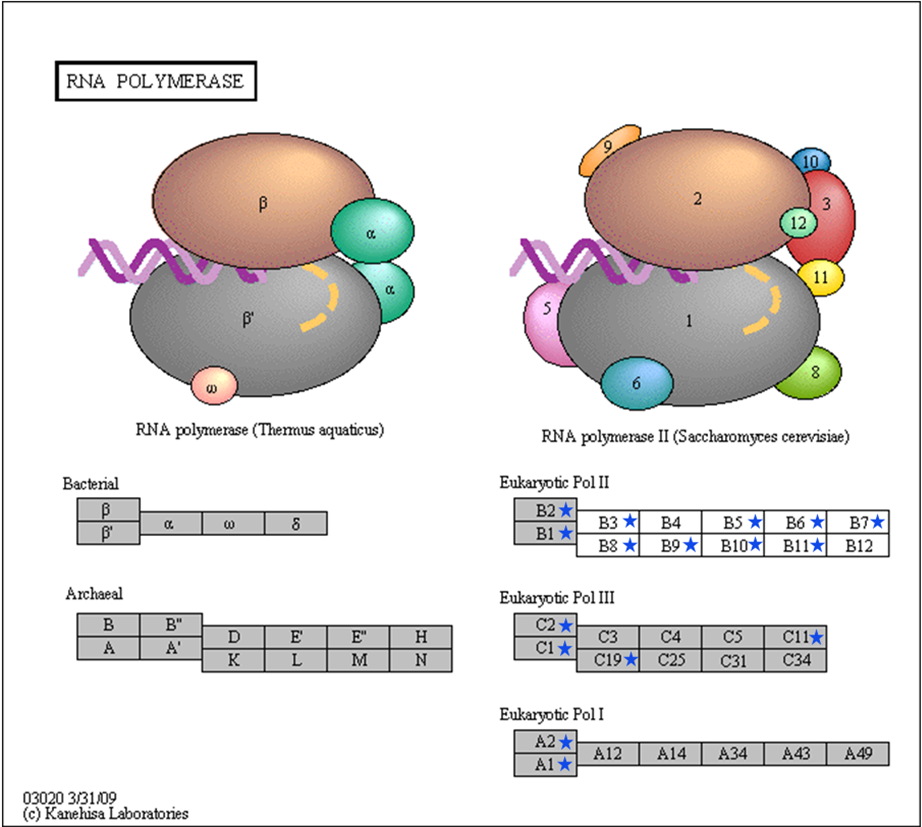
**

Figure S1 – Map of the subunits that comprise the RNA polymerase. Gray boxes represent the subunits identified by AnEnPi for Tritryps. White boxes are those that were not identified by KEGG neither by AnEnPi. () Subunits of RNA polymerase that KEGG identified for Tritryps. Modified from http://www.genome.jp/kegg/pathway/ko/ko03020.html.

Note: Multimeric enzymes may cause problems with data parsing, because in some cases the attributes of the whole enzyme (like its activity or EC number) are inherited by all its subunits, which may be different genes, thus generating artifacts in our analysis that have to be manually curated.

Table S1 – Description of the RNA polymerase’s subunits highlighted in RNA polymerase map. (---) No EC associated. (X) Detected.

| **Acronym** | **Definition** | **EC** | **KEGG** | **AnEnPi** |
| --- | --- | --- | --- | --- |
| ***Bacterial*** |  |  |  |  |
| β | DNA-directed RNA polymerase subunit beta | 2.7.7.6 | X | X |
| β' | DNA-directed RNA polymerase subunit beta' | 2.7.7.6 | X | X |
| α | DNA-directed RNA polymerase subunit alpha | 2.7.7.6 | X | X |
| ω | DNA-directed RNA polymerase subunit omega | 2.7.7.6 | X | X |
| δ | DNA-directed RNA polymerase subunit delta | 2.7.7.6 | X | X |
| ***Archaeal*** |  |  |  |  |
| A | DNA-directed RNA polymerase subunit A | 2.7.7.6 | X | X |
| A’ | DNA-directed RNA polymerase subunit A' | 2.7.7.6 | X | X |
| B | DNA-directed RNA polymerase subunit B' | 2.7.7.6 | X | X |
| B” | DNA-directed RNA polymerase subunit B” | 2.7.7.6 | X | X |
| D | DNA-directed RNA polymerase subunit D | 2.7.7.6 | X | X |
| K | DNA-directed RNA polymerase subunit K | 2.7.7.6 | X | X |
| E’ | DNA-directed RNA polymerase subunit E' | 2.7.7.6 | X | X |
| E” | DNA-directed RNA polymerase subunit E” | 2.7.7.6 | X | X |
| H | DNA-directed RNA polymerase subunit H | 2.7.7.6 | X | X |
| M | DNA-directed RNA polymerase subunit M | 2.7.7.6 | X | X |
| N | DNA-directed RNA polymerase subunit N | 2.7.7.6 | X | X |
| ***Eukaryotic Pol I*** |  |  |  |  |
| A1 | DNA-directed RNA polymerase I subunit A1 | 2.7.7.6 | X | X |
| A2 | DNA-directed RNA polymerase I subunit A2 | 2.7.7.6 | X | X |
| A12 | DNA-directed RNA polymerase I subunit A12 | 2.7.7.6 |  | X |
| A14 | DNA-directed RNA polymerase I subunit A14 | 2.7.7.6 |  | X |
| A34 | DNA-directed RNA polymerase I subunit A34 | 2.7.7.6 |  | X |
| A43 | DNA-directed RNA polymerase I subunit A43 | 2.7.7.6 |  | X |
| A49 | DNA-directed RNA polymerase I subunit A49 | 2.7.7.6 |  | X |
| ***Eukaryotic Pol II*** |  |  |  |  |
| B1 | DNA-directed RNA polymerase II subunit A | 2.7.7.6 | X | X |
| B2 | DNA-directed RNA polymerase II subunit B | 2.7.7.6 | X | X |
| B3 | DNA-directed RNA polymerase II subunit C | --- | X |  |
| B5 | DNA-directed RNA polymerase II subunit E | --- | X |  |
| B6 | DNA-directed RNA Polymerase II subunit F | --- | X |  |
| B7 | DNA-directed RNA polymerase II subunit G | --- | X |  |
| B8 | DNA-directed RNA polymerase II subunit H | --- | X |  |
| B9 | DNA-directed RNA polymerase II subunit I | --- | X |  |
| B10 | DNA-directed RNA Polymerase II subunit L | --- | X |  |
| B11 | DNA-directed RNA polymerase II subunit J | --- | X |  |
|  |  |  |  |  |
|  |  |  |  |  |
|  |  |  |  |  |
|  |  |  |  |  |
|  |  |  |  |  |
|  |  |  |  |  |
|  |  |  |  |  |
|  |  |  |  |  |
| ***Eukaryotic Pol III*** |  |  |  |  |
| C1 | DNA-directed RNA polymerase III subunit C1 | 2.7.7.6 | X | X |
| C2 | DNA-directed RNA polymerase III subunit C2 | 2.7.7.6 | X | X |
| C3 | DNA-directed RNA polymerase III subunit C3 | 2.7.7.6 |  | X |
| C4 | DNA-directed RNA polymerase III subunit C4 | 2.7.7.6 |  | X |
| C5 | DNA-directed RNA Polymerase III subunit C5 | 2.7.7.6 |  | X |
| C11 | DNA-directed RNA polymerase III subunit C11 | 2.7.7.6 | X | X |
| C19 | DNA-directed RNA polymerase III subunit C19 | 2.7.7.6 | X | X |
| C25 | DNA-directed RNA polymerase III subunit C25 | 2.7.7.6 |  | X |
| C31 | DNA-directed RNA polymerase III subunit C31 | 2.7.7.6 |  | X |
| C34 | DNA-directed RNA polymerase III subunit C34 | 2.7.7.6 |  | X |

Table S2 – Description of the enzymatic activities highlighted in Aminoacyl-tRNA biosynthesis map (fig. 2). (*) This EC was updated to 2.9.1.2. (‡)This name was replaced by EC 6.1.1.27. (X) Detected. lma, *L. major*; tbr, *T. brucei*.

| **EC** | **Definition** | **KEGG** | **AnEnPi** |
| --- | --- | --- | --- |
| SepRS ‡ | O-phosphoseryl-tRNA synthetase |  | X |
| 2.1.2.9 | Methionyl-tRNA formyltransferase | X (lma e tbr) | X |
| 2.9.1.- * | O-phospho-L-seryl-tRNASec:L-selenocysteinyl-tRNA synthase | X | X |
| 6.1.1.1 | Tyrosyl-tRNA synthetase | X | X |
| 6.1.1.2 | Tryptophanyl-tRNA synthetase | X | X |
| 6.1.1.3 | Threonyl-tRNA synthetase | X | X |
| 6.1.1.4 | Leucyl-tRNA synthetase | X | X |
| 6.1.1.5 | Isoleucyl-tRNA synthetase | X | X |
| 6.1.1.6 | Lysyl-tRNA synthetase | X | X |
| 6.1.1.7 | Alanyl-tRNA synthetase | X | X |
| 6.1.1.9 | Valyl-tRNA synthetase | X | X |
| 6.1.1.10 | Methionyl-tRNA synthetase | X | X |
| 6.1.1.11 | Seryl-tRNA synthetase | X | X |
| 6.1.1.12 | Aspartyl-tRNA synthetase | X | X |
| 6.1.1.14 | Glycyl-tRNA synthetase | X | X |
| 6.1.1.15 | Prolyl-tRNA synthetase | X | X |
| 6.1.1.16 | Cysteinyl-tRNA synthetase | X | X |
| 6.1.1.17 | Glutamyl-tRNA synthetase | X | X |
| 6.1.1.18 | Glutaminyl-tRNA synthetase | X | X |
| 6.1.1.19 | Arginyl-tRNA synthetase | X | X |
| 6.1.1.20 | Phenylalanyl-tRNA synthetase | X | X |
| 6.1.1.21 | Histidyl-tRNA synthetase | X | X |
| 6.1.1.22 | Asparaginyl-tRNA synthetase | X | X |

***DNA replication (map03030)***

**
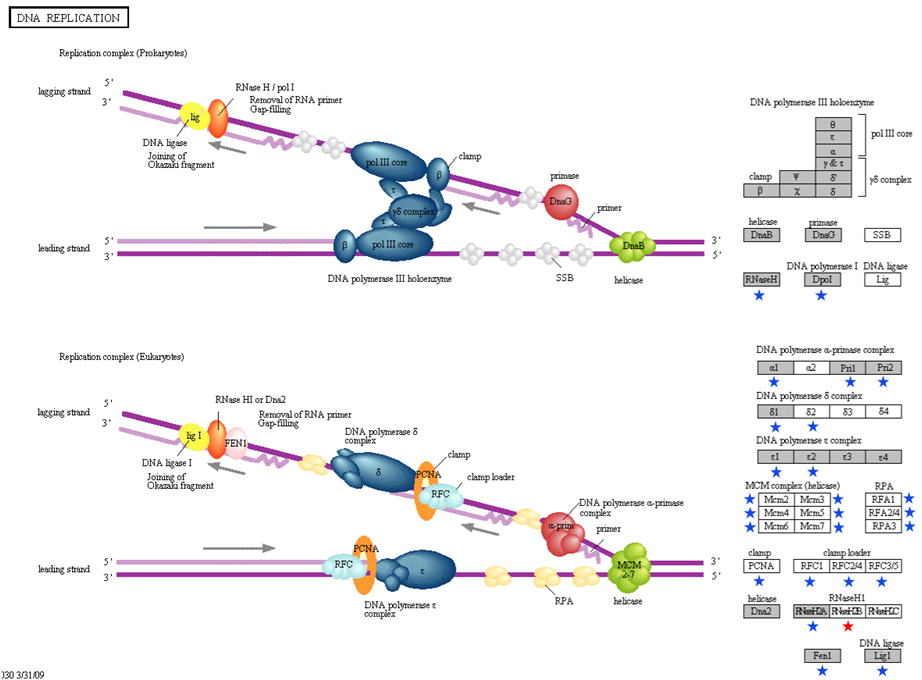
**

Figure S2 - Map of the DNA replication. Gray boxes represent the subunits/proteins identified by AnEnPi for Tritryps. White boxes are those that were not identified by KEGG neither by AnEnPi. () Subunits which KEGG identified for Tritryps. () This subunit was identified by KEGG only for *T. cruzi*. Modified from http://www.genome.jp/kegg/pathway/ko/ko03030.html.

Table S3 – Description of enzyme acronyms and subunits highlighted from DNA replication map and its ECs. (---) No EC associated. (X) Detected. tcr, *T. cruzi*.

| **Acronym** | | **Definition** | **EC** | **KEGG** | **AnEnPi** |
| --- | --- | --- | --- | --- | --- |
| ***Prokaryote*** | | | |  |  |
| Pol III | Pol III core | θ | 2.7.7.7 |  | X |
| ε | 2.7.7.7 |  | X |
| α | 2.7.7.7 |  | X |
| γδ complex | γ & τ | 2.7.7.7 |  | X |
| ψ | 2.7.7.7 |  | X |
| δ’ | 2.7.7.7 |  | X |
| β | 2.7.7.7 |  | X |
| δ | 2.7.7.7 |  | X |
| χ | 2.7.7.7 |  | X |
| DnaB | | DNA helicase | 3.6.1.- |  | X |
| DnaG | | Dna primase | 2.7.7.- |  | X |
| RNaseH | | Ribonuclease HI | 3.1.26.4 | X | X |
| DpoI | | DNA polymerase I | 2.7.7.7 | X | X |
| ***Eukaryote*** | | | |  |  |
| Pol α-primase complex | α1 | Subunit A | 2.7.7.7 | X | X |
| α2 | Subunit B | --- |  |  |
| Pri1 | DNA primase small subunit | 2.7.7.- | X | X |
| Pri2 | DNA primase large subunit | 2.7.7.- | X | X |
| Pol δ complex | δ1 | Subunit 1 | 2.7.7.7 | X | X |
| δ2 | Subunit 2 | --- | X |  |
| δ3 | Subunit 3 | --- |  |  |
| δ4 | Subunit 4 | --- |  |  |
| Pol ε complex | ε1 | Subunit 1 | 2.7.7.7 | X | X |
| ε2 | Subunit 2 | 2.7.7.7 | X | X |
| ε3 | Subunit 3 | 2.7.7.7 |  | X |
| ε4 | Subunit 4 | 2.7.7.7 |  | X |
| MCM complex (helicase) | Mcm2 | Minichromosome Maintenance Protein 2 | --- | X |  |
| Mcm3 | Minichromosome Maintenance Protein 3 | --- | X |  |
| Mcm4 | Minichromosome Maintenance Protein 4 | --- | X |  |
| Mcm5 | Minichromosome Maintenance Protein 5 | --- | X |  |
| Mcm6 | Minichromosome Maintenance Protein 6 | --- | X |  |
| Mcm7 | Minichromosome Maintenance Protein 7 | --- | X |  |
| RPA | RFA1 | Replication Factor A1 | --- | X |  |
| RFA2/4 | Replication Factor A2 | --- | X |  |
| RPA3 | Replication Factor A3 | --- | X |  |
| PCNA | | Proliferating Cell Nuclear Antigen | --- | X |  |
| Clamp loader | RFC1 | Replication Factor C Subunit 1 | --- | X |  |
| RFC2/4 | Replication Factor C Subunit 2/4 | --- | X |  |
| RFC3/5 | Replication Factor C Subunit 3/5 | --- | X |  |
| Dna2 | | ATP-dependent helicase Dna2 | 3.6.1.- |  | X |
| RNaseH1 | RNaseH2A | Ribonuclease H2 Subunit A | 3.1.26.4 | X (tcr) | X |
| RNaseH2B | Ribonuclease H2 Subunit B | --- |  |  |
| RNaseH2C | Ribonuclease H2 Subunit C | --- |  |  |
| Fen1 | | Flap endonuclease-1 | 3.-.-.- | X | X |
| Lig1 | | DNA ligase 1 | 6.5.1.1 | X | X |

***Base Excision Repair (map03410)***

**
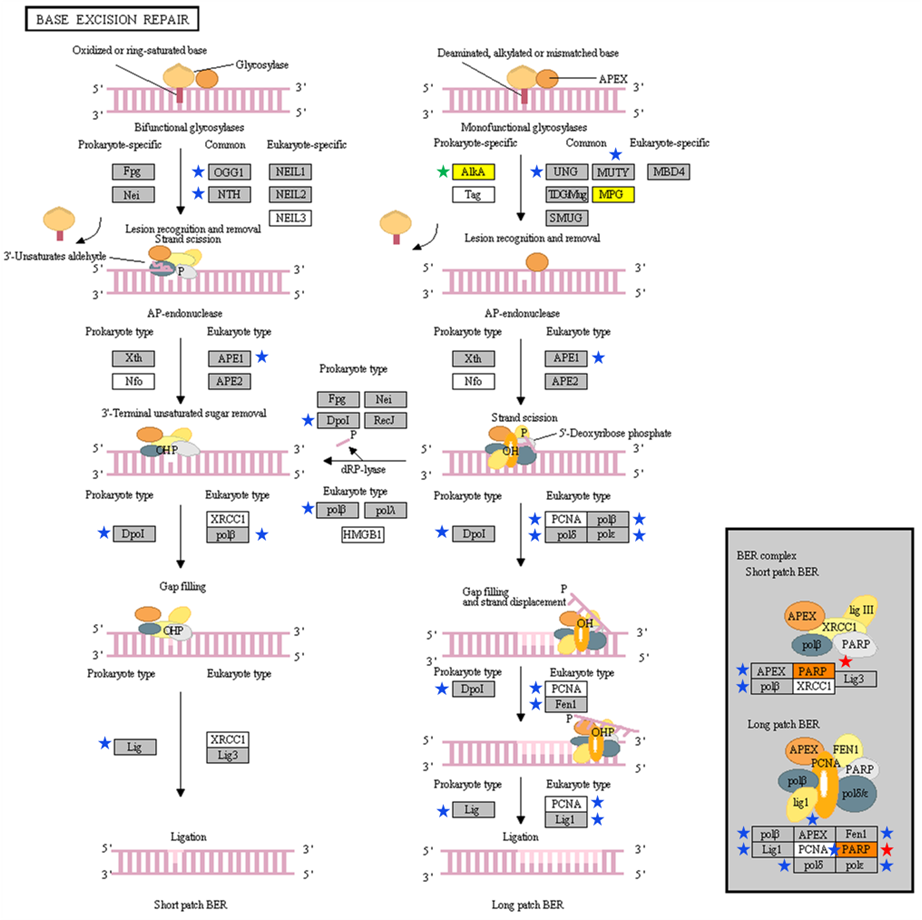
**

Figure S3 – Map from Base Excision Repair. Gray boxes represent the subunits/proteins identified by AnEnPi for Tritryps. White boxes are those that were not identified by KEGG neither by AnEnPi. () Subunits which KEGG identified for Tritryps. () Protein identified by KEGG only for *T. cruzi* and *T. brucei*. () Protein identified by KEGG only for *L. major*. Modified from http://www.genome.jp/kegg/pathway/ko/ko03410.html.

Table S4 – Description from enzymes and subunits highlighted in base excision repair map and its ECs. (---) No EC associated. (X) Detected. lma, *L. major*; tcr, *T. cruzi*; tbr, *T. brucei*.

| **Acronym** | **Description** | **EC** | **KEGG** | **AnEnPi** |
| --- | --- | --- | --- | --- |
| ***Prokaryote*** | | |  |  |
| Fpg | Formamidopyrimidine-DNA glycosylase | 3.2.2.23 / 4.2.99.18 |  | X |
| Nei | Endonuclease VIII | 3.2.2.- / 4.2.99.18 |  | X |
| Xth | Exodeoxyribonuclease III | 3.1.11.2 |  | X |
| Dpo1 | DNA polymerase I | 2.7.7.7 | X | X |
| Lig | DNA ligase | 6.5.1.1 | X | X |
| AlkA | DNA-3-methyladenine glycosylase II | 3.2.2.21 | X (lma) | X (lma) |
| RecJ | Single-Stranded-DNA-Specific Exonuclease | 3.1.-.- |  | X |
| ***Eukaryote*** | | |  |  |
| OGG1 | N-glycosylase/DNA lyase | 3.2.2.- / 4.2.99.18 | X | X |
| NTH | Endonuclease III | 4.2.99.18 | X | X |
| NEIL1 | Endonuclease VIII-like 1 | 3.2.2.- / 4.2.99.18 |  | X |
| NEIL2 | Endonuclease VIII-like 2 | 3.2.2.- / 4.2.99.18 |  | X |
| APE1 | AP endonuclease 1 | 4.2.99.18 | X | X |
| APE2 | AP endonuclease 2 | 4.2.99.18 |  | X |
| Lig3 | DNA ligase 3 | 6.5.1.1 |  | X |
| UNG | Uracil-DNA glycosylase | 3.2.2.- | X | X |
| MUTY | A/G-specific adenine glycosylase | 3.2.2.- | X | X |
| MBD4 | Methyl-CpG-binding domain protein 4 | 3.2.2.- |  | X |
| TDG/MUG | TDG/mug DNA glycosylase family protein | 3.2.2.- |  | X |
| MPG | DNA-3-methyladenine glycosylase | 3.2.2.21 |  | X |
| SMUG1 | Single-Strand Selective Monofunctional Uracil DNA Glycosylase | 3.2.2.- |  | X |
| polβ | DNA polymerase beta subunit | 2.7.7.7 / 4.2.99.- | X | X |
| polλ | DNA polymerase lambda subunit | 2.7.7.7 / 4.2.99.- |  | X |
| PCNA | Proliferating cell nuclear antigen | --- | X |  |
| polδ | DNA polymerase delta subunit 1 | 2.7.7.7 | X | X |
| polε | DNA polymerase epsilon subunit 1 | 2.7.7.7 | X | X |
| Fen1 | Flap endonuclease-1 | 3.-.-.- | X | X |
| Lig1 | DNA ligase 1 | 6.5.1.1 | X | X |
| APEX | AP endonuclease 1 | 4.2.99.18 |  | X |
| PARP | Poly [ADP-ribose] polymerase | 2.4.2.30 | X (tbr e tcr) | X (tbr e tcr) |

***Nucleotide Excision Repair (map03420)***

**
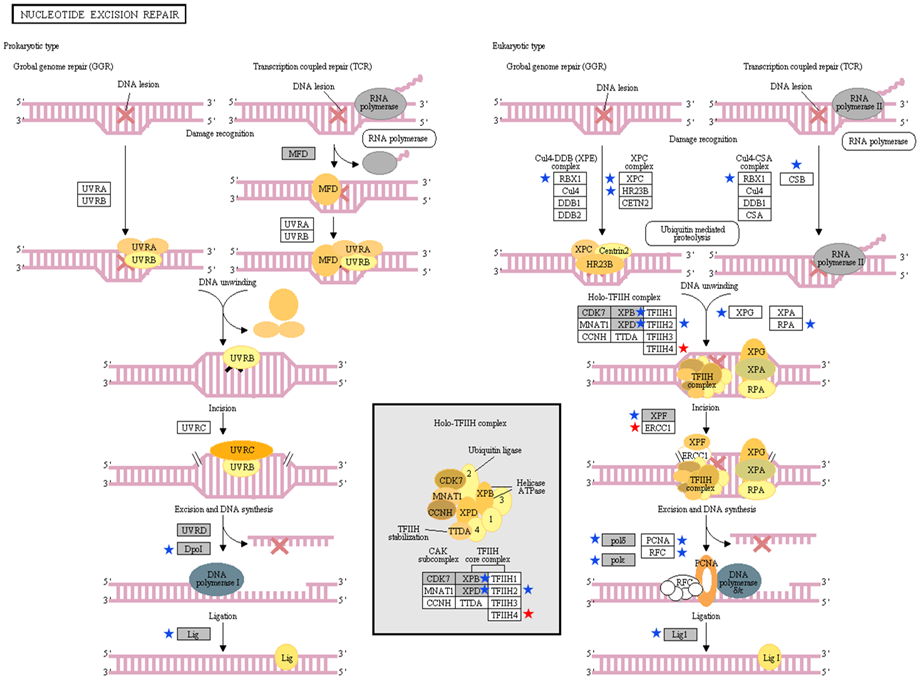
**

Figure S4 - Map from Nucleotide Excision Repair. Gray boxes represent the subunits/proteins identified by AnEnPi for Tritryps. White boxes are those that were not identified by KEGG neither by AnEnPi. () Proteins which KEGG identified for Tritryps. Modified from http://www.genome.jp/kegg/pathway/ko/ko03420.html.

Table S5 – Description from enzymes and subunits highlighted in nucleotide excision repair map and its ECs. (---) No EC associated. (X) Detected. tcr, *T. cruzi*; tbr, *T. brucei*.

| **Acronym** | **Description** | | **EC** | **KEGG** | **AnEnPi** |
| --- | --- | --- | --- | --- | --- |
| ***Prokaryote*** | | |  |  |  |
| MFD | DNA helicase II / ATP-dependent DNA helicase PcrA | | 3.6.1.- |  | X |
| DpoI | DNA polymerase I | | 2.7.7.7 | X | X |
| Lig | DNA ligase (ATP) | | 6.5.1.1 | X | X |
| UVRD | DNA helicase II / ATP-dependent DNA helicase PcrA | | 3.6.1.- |  | X |
| ***Eukaryote*** | |  |  |  |  |
| RBX1 | RING-box protein 1 | | --- | X |  |
| XPC | Xeroderma Pigmentosum Group C-Complementing Protein | | --- | X |  |
| HR23B | UV excision repair protein RAD23 | | --- | X |  |
| CSB | DNA excision repair protein ERCC-6 | | --- | X |  |
| CDK7 | Cyclin-dependent kinase 7 | | 2.7.11.22 |  | X |
| XPB | DNA excision repair protein ERCC-3 | | 3.6.1.- | X | X |
| XPD | DNA excision repair protein ERCC-2 | | 3.6.1.- | X | X |
| TFIIH2 | Transcription initiation factor TFIIH subunit H2 | | --- | X |  |
| TFIIH4 | Transcription initiation factor TFIIH subunit H4 | | --- | X (tbr e tcr) |  |
| XPG | DNA excision repair protein ERCC-5 | | --- | X |  |
| RPA | Replication factor A1 | | --- | X |  |
| XPF | DNA excision repair protein ERCC-4 | | 3.1.-.- | X | X |
| ERCC1 | DNA excision repair protein ERCC-1 | | --- | X (tbr e tcr) |  |
| polδ | DNA polymerase delta subunit 1 | | 2.7.7.7 | X | X |
| polε | DNA polymerase epsilon subunit 1 | | 2.7.7.7 | X | X |
| PCNA | Proliferating cell nuclear antigen | | --- | X |  |
| RFC | Replication factor C subunit 1 | | --- | X |  |
| Lig1 | DNA ligase 1 | | 6.5.1.1 | X | X |

***Mismatch Repair (map03430)***

***
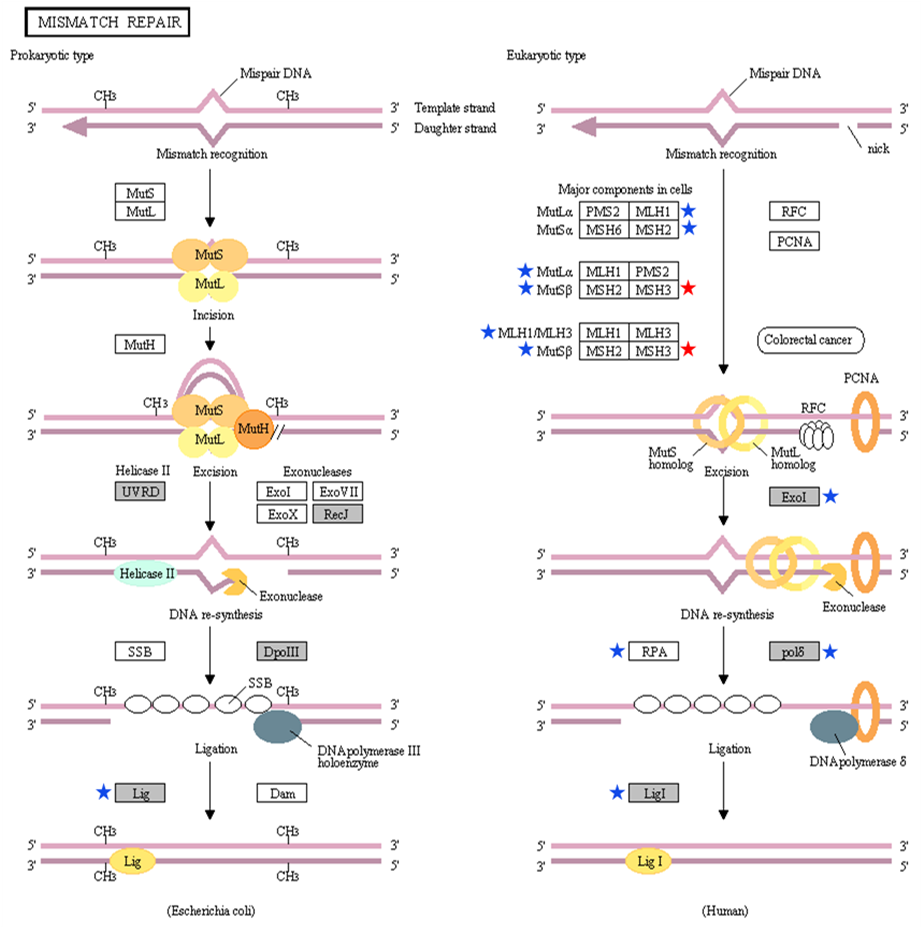
***

Figura S5 - Map from Mismatch Repair. Gray boxes represent the subunits/proteins identified by AnEnPi for Tritryps. White boxes are those that were not identified by KEGG neither by AnEnPi. () ECs which KEGG identified for Tritryps. () ECs only detected in *T. brucei* and *T. cruzi*, by KEGG. Modified from http://www.genome.jp/kegg/pathway/ko/ko03430.html.

Table S6 – Description from enzymes and subunits highlighted in mismatch repair map and its ECs. (---) No EC associated. (X) Detected. tcr, *T. cruzi*; tbr, *T. brucei*.

| **Acronym** | **Description** | **EC** | **KEGG** | **AnEnPi** |
| --- | --- | --- | --- | --- |
| ***Prokaryote*** | |  |  |  |
| UVRD | DNA helicase II / ATP-dependent DNA helicase PcrA | 3.6.1.- |  | X |
| RecJ | single-stranded-DNA-specific exonuclease | 3.1.-.- |  | X |
| DpoIII | DNA polymerase III subunit alpha | 2.7.7.7 |  | X |
| Lig | DNA ligase (ATP) | 6.5.1.1 | X | X |
| ***Eukaryote*** | |  |  |  |
| MLH1 | DNA mismatch repair protein MLH1 | --- | X |  |
| MSH2 | DNA mismatch repair protein MSH2 | --- | X |  |
| MSH3 | DNA mismatch repair protein MSH3 | --- | X |  |
| MLH3 | DNA mismatch repair protein MLH3 | --- | X (tbr e tcr) |  |
| ExoI | Exonuclease 1 | 3.1.-.- | X | X |
| polδ | DNA polymerase delta subunit 1 | 2.7.7.7 | X | X |
| RPA | Replication factor A1 | --- | X |  |
| Lig1 | DNA ligase 1 | 6.5.1.1 | X | X |

***Homologous Recombination (map03440)***

***
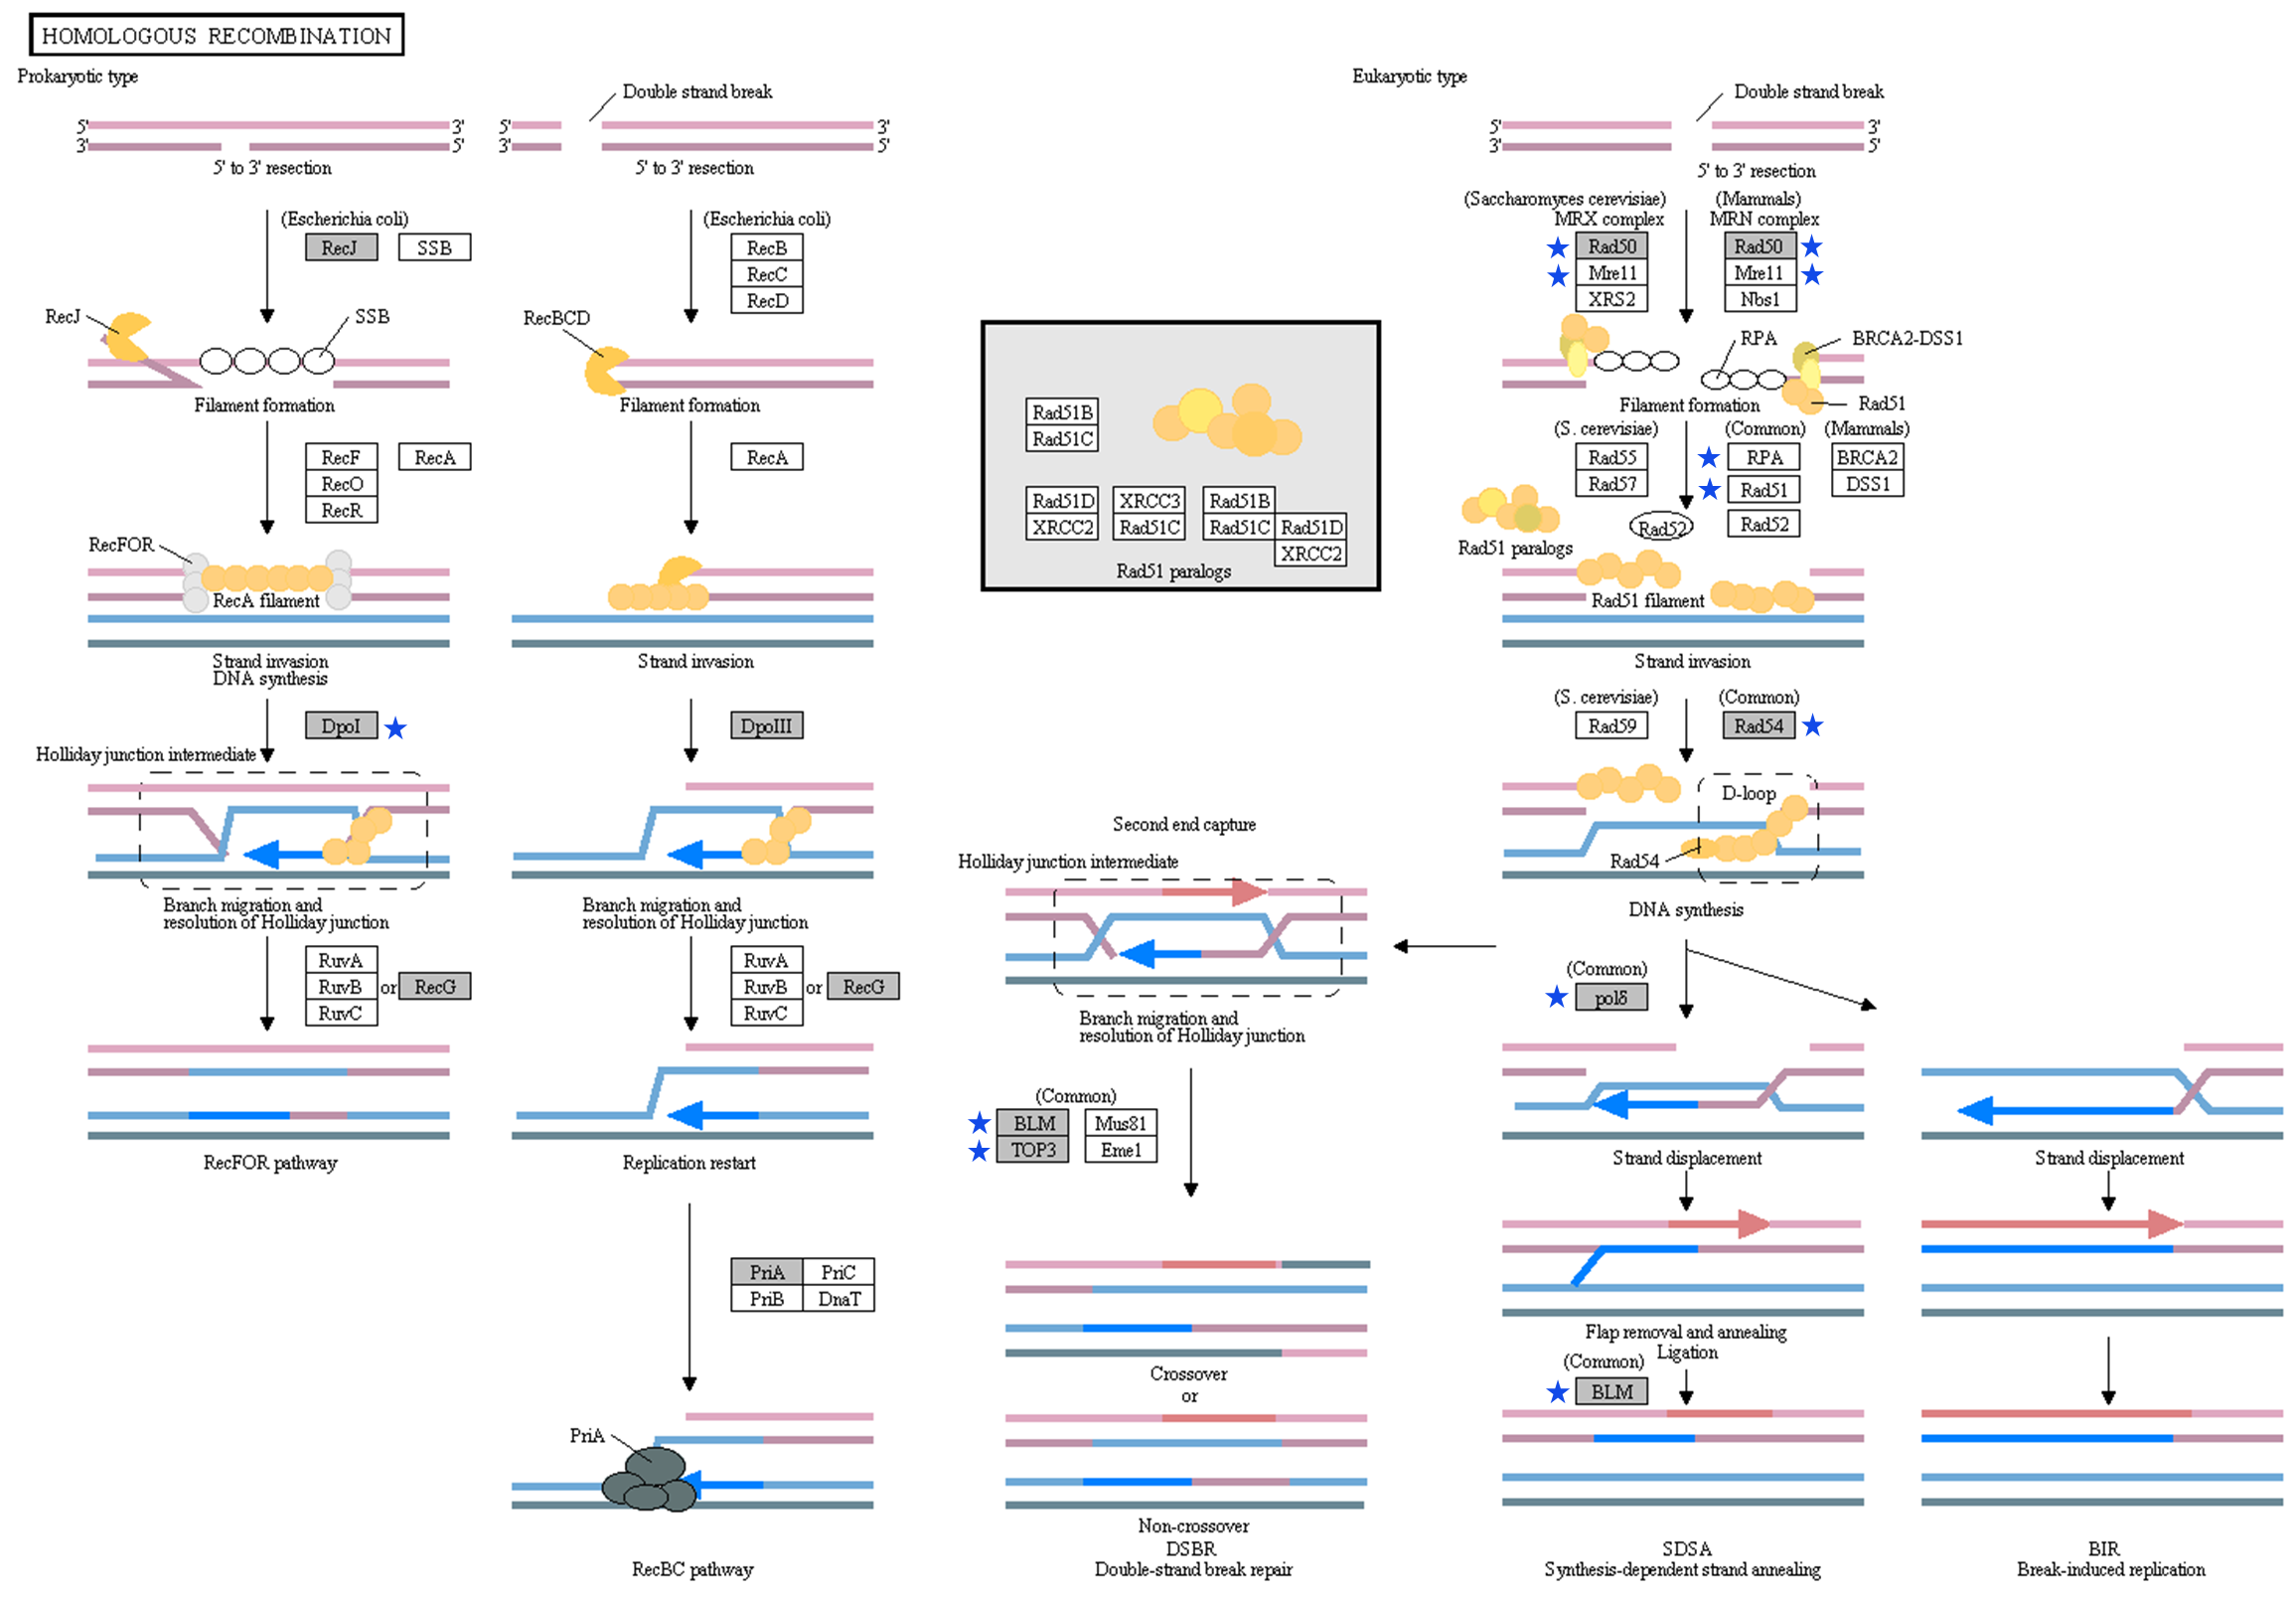
***

Figura S6 – Map from Homologous Recombination. Gray boxes represent the subunits/proteins identified by AnEnPi for Tritryps. White boxes are those that were not identified by KEGG neither by AnEnPi. () ECs which KEGG identified for Tritryps. Modified from http://www.genome.jp/kegg/pathway/ko/ko03440.html.

Table S7 – Description from enzymes and subunits highlighted in homologous recombination map and its ECs. (---) No EC associated. (X) Detected.

| **Acronym** | **Definition** | **EC** | **KEGG** | **AnEnPi** |
| --- | --- | --- | --- | --- |
| ***Prokaryote*** | |  |  |  |
| RecJ | Single-Stranded-DNA-Specific Exonuclease | 3.1.-.- |  | X |
| DpoI | DNA Polymerase I | 2.7.7.7 | X | X |
| DpoIII | DNA Polymerase III Subunit Alpha | 2.7.7.7 |  | X |
| RecG | ATP-Dependent DNA Helicase Recg | 3.6.1.- |  | X |
| PriA | Primosomal Protein N' (Replication Factor Y) (Superfamily II Helicase) | 3.6.1.- |  | X |
| ***Eukaryote*** | |  |  |  |
| RAD50 | DNA Repair Protein RAD50 | 3.6.-.- | X | X |
| Mre11 | Double-Strand Break Repair Protein MRE11 | --- | X |  |
| RPA | Replication Factor A1 | --- | X |  |
| Rad51 | DNA Repair Protein RAD51 | --- | X |  |
| Rad54 | DNA Repair And Recombination Protein RAD54 And RAD54-Like Protein | 3.6.1.- | X | X |
| polδ | DNA Polymerase Delta Subunit 1 | 2.7.7.7 | X | X |
| BLM | Bloom Syndrome Protein | 3.6.1.- | X | X |
| TOP3 | DNA Topoisomerase III | 5.99.1.2 | X | X |

***Non-homologous End-joining (map03450)***


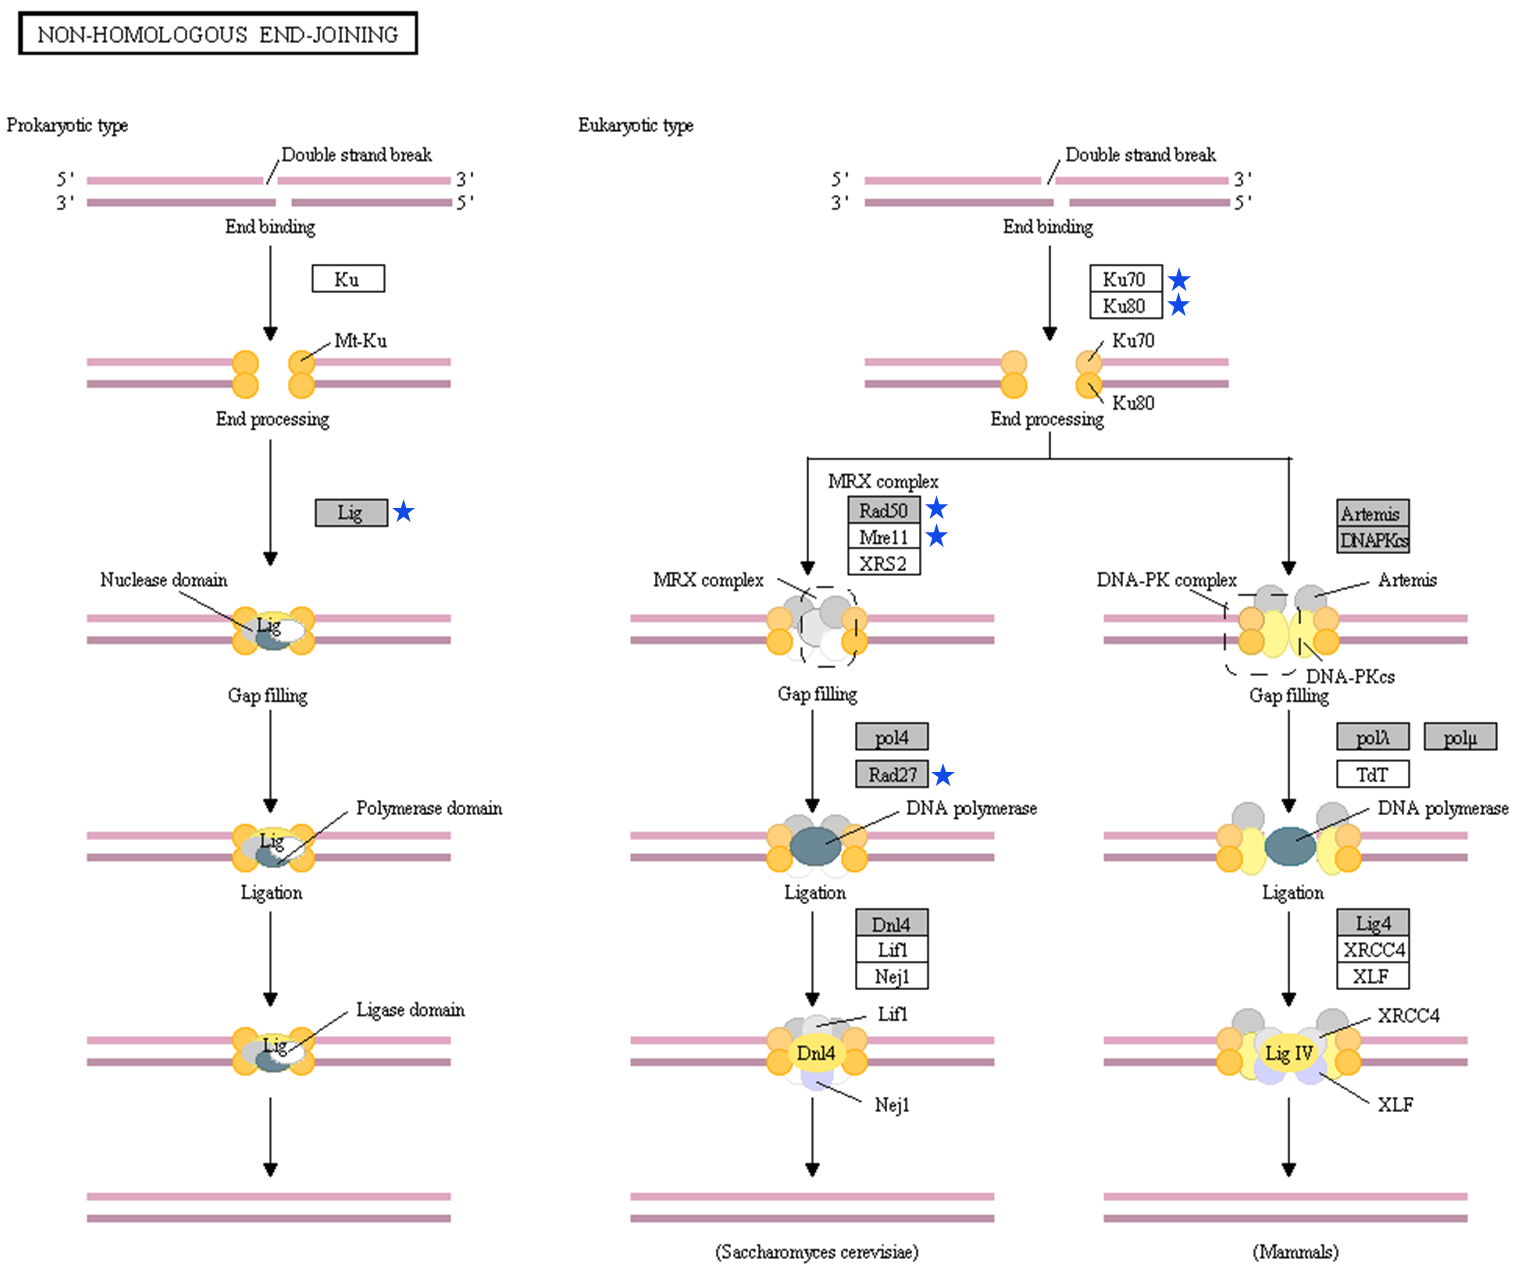


Figura S7 - Map from Non-homologous End-joining. Gray boxes represent the subunits/proteins identified by AnEnPi for Tritryps. White boxes are those that were not identified by KEGG neither by AnEnPi.() ECs which KEGG identified for Tritryps. Modified from http://www.genome.jp/kegg/pathway/ko/ko03450.html.

Table S8 – Description from enzymes and subunits highlighted in non-homologous end-joining map and its ECs. (---) No EC associated. (X) Detected.

| **Acronym** | **Description** | **EC** | **KEGG** | **AnEnPi** |
| --- | --- | --- | --- | --- |
| ***Prokaryote*** | |  |  |  |
| Lig | DNA ligase (ATP) | 6.5.1.1 | X | X |
| ***Eukaryote*** | |  |  |  |
| Ku70 | ATP-dependent DNA helicase 2 subunit 1 | --- |  | X |
| Ku80 | ATP-dependent DNA helicase 2 subunit 2 | --- |  | X |
| Rad50 | DNA repair protein RAD50 | 3.6.-.- | X | X |
| Mre11 | double-strand break repair protein MRE11 | --- | X |  |
| Artemis | DNA cross-link repair 1C protein | 3.1.-.- |  | X |
| DNAPKcs | DNA-dependent protein kinase catalytic subunit | 2.7.11.1 |  | X |
| Pol4 | DNA polymerase IV | 2.7.7.7 |  | X |
| Rad27 | flap endonuclease-1 | 3.-.-.- | X | X |
| polλ | DNA polymerase lambda subunit | 2.7.7.7 / 4.2.99.- |  | X |
| polμ | DNA polymerase mu subunit | 2.7.7.7 |  | X |
| Dnl4 | DNA ligase 4 | 6.5.1.1 |  | X |
| Lig4 | DNA ligase 4 | 6.5.1.1 |  | X |
